# 1 Lifestyle-intervention-induced reduction of 2 abdominal fat is reflected by a decreased 3 circulating glycerol level and an increased HDL 4 diameter

---

5 Marian Beekman<sup>1\*#</sup>, Bianca A.M. Schutte<sup>1\*</sup>, Erik B. van den Akker<sup>1,2</sup>, Raymond Noordam<sup>7</sup>, Petra Dibbets-  
6 Schneider<sup>3</sup>, Lioe-Fee de Geus-Oei<sup>3</sup>, Joris Deelen<sup>1,4</sup>, Ondine van de Rest<sup>5</sup>, Diana van Heemst<sup>6</sup>, Edith J.M.  
7 Feskens<sup>5</sup>, and P. Eline Slagboom<sup>1</sup>

8 \* Shared first author

9 # Corresponding author: [m.beekman@lumc.nl](mailto:m.beekman@lumc.nl)

10 <sup>1</sup>Department of Molecular Epidemiology, Leiden University Medical Center, the Netherlands, <sup>2</sup>The Delft  
11 Bioinformatics Lab, Delft University of Technology, the Netherlands, <sup>3</sup>Department of Radiology, Leiden  
12 University Medical Center, The Netherlands, <sup>4</sup>Max Planck Institute for Biology of Ageing, Germany, <sup>5</sup>Division of  
13 Human Nutrition and Health, Wageningen University & Research, the Netherlands, <sup>6</sup>Department of Internal  
14 Medicine, section of Gerontology and Geriatrics, Leiden University Medical Center, the Netherlands

## 15 **Keywords**

16 Lifestyle intervention, Abdominal fat, Biomarker, Metabolomics

## 17 **Correspondence to**

18 Marian Beekman: [M.Beekman@LUMC.nl](mailto:M.Beekman@LUMC.nl)

## 19 **Abbreviations**

20 <sup>1</sup>H-NMR: Proton Nuclear Magnetic Resonance

21 ApoB: Apolipoprotein B

22 BCAA: Branched-Chain Amino Acid

23 BMI: Body Mass Index

24 CVD: Cardiovascular disease

25 DXA: Dual X-ray Absorptiometry

26 Glol: Glycerol

27 GOTO: Growing Old TOgether (Lifestyle intervention study)

28 HDL: High Density Lipoprotein

29 LDL: Low Density Lipoprotein

30 MUFA: Monounsaturated Fatty Acid

31 SD: Standard deviation

32 VLDL: Very Low Density Lipoprotein

33

34 SCOPE

35 Abdominal obesity is one of the main modifiable risk factors of age-related cardiometabolic disease.  
36 Cardiometabolic disease risk and its associated high abdominal fat mass, high cholesterol and  
37 glucose concentrations can be reduced by a healthier lifestyle. Hence, our aim is to understand the  
38 relation between lifestyle-induced changes in body composition, and specifically abdominal fat, and  
39 accompanying changes in circulating metabolic biomarkers.

40 Methods and results

41 We used the data from the Growing Old Together (GOTO) study, in which 164 older adults (mean  
42 age 63 years, BMI 23-35 kg/m<sup>2</sup>) changed their lifestyle during 13 weeks by 12.5% caloric restriction  
43 plus 12.5% increase in energy expenditure. We show that levels of circulating metabolic biomarkers,  
44 even after adjustment for body mass index, specifically associate with abdominal fat mass. Next, we  
45 show that the applied lifestyle intervention mainly reduces abdominal fat mass (-2.6%, SD=3.0) and  
46 that this reduction, when adjusted for general weight loss, is highly associated with decreased  
47 circulating glycerol concentrations and increased HDL diameter.

48 Conclusions

49 The lifestyle-induced reduction of abdominal fat mass is particularly associated, independent of  
50 body mass index or general weight loss, with associated with decreased circulating glycerol  
51 concentrations and increased HDL diameter.

52

53

## 54 1. Introduction

55 Abdominal obesity plays an important role in the development of cardiometabolic disease risk<sup>[1, 2]</sup>.  
56 People with relatively high amounts of abdominal fat are characterized by increased insulin  
57 resistance<sup>[3]</sup> and a detrimental circulating metabolic biomarker profile encompassing high levels of  
58 glucose, cholesterol and triglycerides<sup>[4]</sup>, all of which are known to be associated with type 2 diabetes  
59 and cardiovascular disease<sup>[5-12]</sup>. Reduction of cardiovascular risk can be achieved by lifestyle  
60 interventions aimed at increasing physical activity and/or reducing caloric intake<sup>[13, 14]</sup>. Because  
61 abdominal fat is intimately linked to disease risk, it is imperative to understand the relation between  
62 the lifestyle-induced changes in body composition, specifically abdominal fat, and the accompanying  
63 changes in metabolic biomarkers.

64 To gain more insight than what would be achieved by only measuring the standard metabolic clinical  
65 chemistry parameters, such as cholesterol and glucose levels, state-of-the-art <sup>1</sup>H-NMR metabolomics  
66 platforms have been used to investigate the relationship between metabolism and body  
67 composition. In young people (age between 25 and 30 years), a larger amount of abdominal fat has  
68 been associated with an unfavourable lipoprotein profile (i.e. high VLDL, IDL, LDL and small HDL  
69 particle concentrations, high IDL- and LDL-cholesterol, triglycerides, ApoB and ApoB to ApoA1 ratio  
70 and low large HDL particle concentration, HDL-cholesterol and small HDL diameter)<sup>[5]</sup>. In general, an  
71 unhealthy metabolic profile, as measured by the <sup>1</sup>H-NMR platform, can be improved by a lifestyle  
72 change<sup>[13-16]</sup> that is known to particularly reduce the amount of abdominal fat mass<sup>[17-19]</sup>. However, it  
73 remains unclear how and to what extent lifestyle-induced changes in body composition, specifically  
74 the reduction in abdominal fat, are reflected by circulating metabolic biomarkers.

75 We investigated the relation between lifestyle-induced changes in body composition and the  
76 altering blood metabolome, by exploring the data collected in the Growing Old Together study  
77 (GOTO); a 13-week-lifestyle intervention study in which older participants (N=164, Age<sub>mean</sub>=63 years  
78 old (age range 49-75 years), BMI<sub>mean</sub>=27 (BMI range 23-35 kg/m<sup>2</sup>) at the moment of inclusion)  
79 increased physical activity by 12.5% and decreased energy intake by 12.5%<sup>[13]</sup>. Body composition  
80 parameters were measured with anthropometrics and a DXA scan, while metabolic biomarkers were  
81 measured in serum using <sup>1</sup>H-NMR metabolomics, both before and after the intervention. First, at  
82 baseline we cross-sectionally correlated body composition measures with circulating metabolic  
83 biomarkers levels. Second, we determined the effect of the GOTO lifestyle intervention on <sup>1</sup>H-NMR  
84 metabolomic biomarkers. Third, we determined how body composition measures were affected by  
85 the lifestyle intervention. Finally, we investigated the associations between the change in multiple  
86 measures of body composition and the changes in metabolic biomarkers to determine which of  
87 these biomarkers reflected the alterations in body composition by a lifestyle change.

## 88 2. Experimental section

### 89 2.1 Study design

90 The GOTO study has previously been described by van de Rest *et al.*<sup>[13]</sup>. The Medical Ethical  
91 Committee of the Leiden University Medical Center approved the study and all participants signed a  
92 written informed consent. All experiments were performed in accordance with relevant and  
93 approved guidelines and regulations. This trial was registered at the Dutch Trial Register  
94 (<http://www.trialregister.nl>) as NTR3499.

95 In short, the lifestyle intervention comprised 13 weeks of 25% lowered energy balance by 12.5%  
96 reduction in energy intake and 12.5% increase in physical activity under supervision of a dietician  
97 and a physiotherapist. Participants were recruited within the Leiden Longevity Study<sup>[20]</sup>, consisting of  
98 a member of a long-lived family and its partner. Participants (N=164) were between 46 and 75 years  
99 (mean age 63 years), had a BMI between 23 and 35 kg/m<sup>2</sup> (mean BMI = 27 kg/m<sup>2</sup>), no diabetes  
100 (fasting glucose <7.0 mmol/L) or any disease or condition that seriously affects body weight and/or  
101 body composition including active types of cancer (Table S1).

102 The participants provided a report of their pharmacist about their current medication use, from  
103 which the use of lipid lowering medication (fibrates, niacin, bile acid sequestrants, 3-hydroxy-3-  
104 methylglutaryl-coenzyme A reductase inhibitors) and hypertension medication (diuretics, beta-  
105 blockers, calcium channel blockers, agents acting on the renin-angiotensin system) was deduced.

106 In the present paper the analyses have been performed on the subgroup of 132 participants for  
107 whom we had data on anthropometrics, DXA measures and NMR metabolomics (Nightingale Health)  
108 were available at baseline as well as at the endpoint of the study (Table 1).

### 109 2.2 Body composition measurements

110 We had data available for 7 anthropometric measures based on weight, height, waist circumference  
111 and hip circumference. Weight was measured to the nearest 0.1 kg using a digital personal scale  
112 (Seca Clara 803 scale, Seca Deutschland, Hamburg, Germany) with the person dressed in light  
113 clothing and without shoes. Height, waist circumference (midpoint between the lowest rib and the  
114 top of the iliac crest) and hip circumference (largest circumference of buttocks) were measured to  
115 the nearest 0.1 cm with a non-elastic tape in standing position without shoes. BMI is calculated using  
116 the Quetelet index:  $\text{weight}(\text{kg})/(\text{height}(\text{cm}))^2$ . Waist hip ratio is the ratio of waist circumference (cm)  
117 over hip circumference (cm), and waist height ratio is the ratio of waist circumference (cm) over  
118 height (cm).

119 We measured 11 body composition features using whole-body DXA (Discovery A, Hologic Inc.,  
120 Bedford, MA,USA): whole body lean mass in kilogram (kg), whole body fat in kg and percentage (%)  
121 of whole body weight, trunk fat in kg and % of trunk weight, android fat in kg and % of android  
122 weight, genoid fat in kg and % of genoid weight, leg fat in kg and percentage of leg weight. In  
123 addition, we calculated 6 ratios: trunk fat over whole body fat ratio, android fat over whole body fat  
124 ratio, gynoid fat over whole body fat ratio, leg fat over whole body fat ratio, android fat over gynoid  
125 fat ratio, whole body fat over whole body lean mass ratio (Supporting information, Figure S1).

126 A detailed description of the DXA measurement and an indication of the trunk, android and genoid  
127 body regions can be found in the Supporting Information.

### 128 **2.3 Metabolic Biomarker Profiling**

129 Blood collection took place between 8 and 9 am after at least 10 hours of fasting. Metabolic  
130 biomarkers were quantified from serum samples of 164 individuals using high-throughput <sup>1</sup>H-NMR  
131 metabolomics (Nightingale Health Ltd, Helsinki, Finland). Details of the experimentation and  
132 applications of the NMR metabolomics platform have been described previously<sup>[21]</sup>. This method  
133 provides simultaneous quantification of routine lipids, lipoprotein subclass profiling with lipid  
134 concentrations within 14 subclasses, fatty acid composition, and various low-molecular metabolites  
135 including amino acids, ketone bodies and gluconeogenesis-related metabolites in molar  
136 concentration units. The 14 lipoprotein subclass sizes were defined as follows: extremely large VLDL  
137 with particle diameters from 75 nm upwards and a possible contribution of chylomicrons, five VLDL  
138 subclasses (average particle diameters of 64.0 nm, 53.6 nm, 44.5 nm, 36.8 nm, and 31.3 nm), IDL  
139 (28.6 nm), three LDL subclasses (25.5 nm, 23.0 nm, and 18.7 nm), and four HDL subclasses (14.3 nm,  
140 12.1 nm, 10.9 nm, and 8.7 nm). The mean size for VLDL, LDL and HDL particles was calculated by  
141 weighting the corresponding subclass diameters with their particle concentrations.

142 Due to the high correlation among the metabolic biomarkers, we only analyzed the 65 biomarkers  
143 that have previously been explored for cardiovascular risk by Würtz *et al.*<sup>[22]</sup> to enhance  
144 interpretability. The selection of these biomarkers was based on previous studies using this platform  
145 and the current list comprises the total lipid concentrations, fatty acid composition, and low-  
146 molecular-weight metabolites, including amino acids, glycolysis-related metabolites, ketone bodies  
147 and metabolites involved in fluid balance and immunity (Table S2).

## 148 **2.4 Statistical analysis**

149 For the following metabolic biomarkers, serum levels were below the detection level for at least one  
150 measurement: lipid concentration in Extremely Large VLDL (2.3%), Very Large VLDL (3.0%), Large  
151 VLDL (1.5%), and Large HDL (2.3%), and these values were considered as missing (Table S2 All  
152 metabolic biomarkers were LN-transformed and consecutively Z-scaled (resulting in a mean of 0 and  
153 a standard deviation (SD) of 1). To be able to compare the effects of body composition parameters,  
154 all measurement levels were Z-scaled.

155 Partial correlation of metabolic biomarkers and body composition parameters at baseline was  
156 determined using a linear mixed model adjusted for age, gender, status (longevity family member or  
157 control), lipid lowering medication, hypertension medication (fixed effects) and household (random  
158 effect) with the body composition parameters as outcome. A random effect for household was  
159 included to account for the potentially increased similarity among household members (85% belong  
160 to a couple sharing a household, i.e. 56 couples in our study), as they generally share diet and other  
161 lifestyle factors.

162 To determine the partial correlation of the change in the metabolic biomarker levels and the change  
163 in the body composition parameters after the intervention, a linear mixed model was used with the  
164 metabolic biomarker levels as outcome and body composition as determinant adjusted for age,  
165 gender, status (longevity family member or control), lipid lowering medication, hypertension  
166 medication (fixed effects), household, and individual (random effects). For additional analyses,  
167 weight was added to the model to determine general weight loss-independent effects.

168 All statistical analyses were performed with STATA/SE 13.1 and heatmaps were generated using the  
169 *heatmap.2* function of the *gplots* package in R. Since we tested 65 metabolic biomarkers and 22  
170 body composition phenotypes we considered  $p < 3.5 \times 10^{-5}$  ( $0.05/(65 \times 22)$ ) as significant after  
171 adjustment for multiple testing.

## 172 **3. Results**

### 173 **3.1 Study population**

174 The current investigation of the relation between changing body composition and circulating  
175 metabolic biomarkers was performed in a representative subgroup of 132 participants of the GOTO  
176 study of whom body composition measures and <sup>1</sup>H-NMR circulating metabolic biomarkers were  
177 available before and after the intervention (Table 1). The mean age of the study participants was 63  
178 years (range 46-75 years), they had a mean BMI of 27 kg/m<sup>2</sup> (SD 2.4) and 18 participants (11%) were  
179 obese (BMI>30 kg/m<sup>2</sup>).

### 180 **3.2 Abdominal fat associates with circulating metabolic biomarkers and** 181 **body composition on baseline**

182 In order to compare our findings with those from a previous study in younger individuals<sup>[5]</sup>, we first  
183 investigated the association between body composition parameters and circulating metabolic  
184 biomarkers of the GOTO study at baseline (Figure S2). We confirmed that body composition  
185 features, especially large amount of abdominal fat measures, mainly associated with smaller HDL  
186 diameter, higher VLDL particle concentrations and higher circulating levels of triglyceride and  
187 glycoprotein acetyls (Figure S2). In contrast, in the GOTO study that consisted of older adults, a  
188 larger amount of abdominal fat mass was additionally associated with higher circulating  
189 concentrations of glycerol and 3-hydroxybutyrate. Furthermore, we observed stronger associations  
190 with the DXA fat measures than with the anthropometrics parameters of body composition.

191 We subsequently investigated whether the associations between body composition and circulating  
192 metabolic biomarker levels would still hold after adjustment for BMI. Figure 1 shows a heatmap of  
193 the partial correlation (adjusted for BMI) between metabolic biomarkers and body composition  
194 parameters at baseline. The hierarchical clustering on basis of the partial correlations between body  
195 composition measures and metabolic biomarkers, clusters body composition parameters roughly  
196 into 5 clusters (Figure 1, colours at left): 1) Green: DXA measures for abdominal fat, 2) Violet:  
197 Anthropometric measures of abdominal fat, 3) Orange: Whole body composition, 4) Yellow: Lower  
198 body fat and lean mass, 5) Blue: DXA measures of the ratio between lower body fat and whole body  
199 fat. After adjustment for BMI just the DXA measures of abdominal fat and the inversely correlated  
200 ratio of lower body fat over whole body fat were associated with circulating metabolic biomarkers.  
201 Since the lower body fat measures themselves do not show any association with metabolic  
202 biomarkers, the latter association seems to be driven by the whole body fat measure. Hence, after  
203 adjustment for BMI, we observed that a higher percentage of fat in the trunk or android body  
204 regions (abdominal fat) associated with a lower concentration of lipids in (extra) large HDL particles  
205 and smaller HDL diameter, a higher concentration of lipids in (extra) large VLDL particles, and higher  
206 circulating levels of leucin, isoleucine, serum triglycerides, glycoprotein acetyls, 3-hydroxybutyrate,  
207 and glycerol.

### 208 **3.3 Lifestyle change reduces CVD-associated metabolic biomarkers and** 209 **abdominal fat**

210 Second, we investigated which of the 65 circulating metabolic biomarkers changed in response to  
211 the intervention. In total 46 metabolic biomarkers changed significantly due to the intervention and  
212 the most prominent effects were observed for LDL and VLDL subclass concentrations, and levels of  
213 apoB, monounsaturated fatty acids, triglycerides and cholesterol (Table S3). The metabolic

214 biomarkers responding to the lifestyle intervention combining less caloric intake and more physical  
215 activity, clearly responded in the direction of lower risk for cardiovascular disease as reported by  
216 Würtz et al<sup>[6]</sup>.

217 We also investigated which DXA measure of body composition changed in response to the lifestyle  
218 intervention. Both men and women reduced their whole body fat with 1.5% (IQR= -0.5%—2.6%)  
219 (Figure 2). As expected, android fat and trunk fat reduced most in both women (-2.4% (IQR= -0.5% - -  
220 4.7%) and -2.1% (IQR=-0.6% - -3.4%), respectively) and men (-2.9% (IQR=-0.9% - -5.0%) and -2.3%  
221 (IQR= -1.0% - 3.6%), respectively). Likewise, waist circumference, waist/hip ratio and fat/lean ratio  
222 decreased similarly in men and women (Table S4).

### 223 **3.4 Partial correlations between $\Delta$ metabolic biomarkers and $\Delta$** 224 **abdominal fat.**

225 To determine whether the change in circulating metabolic biomarker levels can be explained by the  
226 reduction in abdominal fat, we investigated whether the change in abdominal fat ( $\Delta$  abdominal fat)  
227 correlates with the change in the levels of 46 metabolic biomarkers ( $\Delta$  metabolic biomarker) that  
228 altered by the lifestyle intervention (Table S3), while adjusting for general weight loss. The reduction  
229 of android and trunk fat, both measured in grams and the percentage of fat in android and trunk,  
230 was most strongly associated, independent of general weight loss, with a decrease in circulating  
231 glycerol levels (Figure S3). If the android fat mass decreased with 1 SD, glycerol levels decreased with  
232 0.35 SD (p-value=  $1.45 \times 10^{-11}$ ; Table 2a). Decreasing ratios of abdominal fat over whole body fat, or  
233 android fat over genoid fat were most strongly associated with an increasing HDL diameter. If the  
234 trunk fat over whole body mass ratio decreased with 1 SD, the HDL diameter increased with 0.36 SD  
235 (p-value=  $2.56 \times 10^{-9}$ ; Table 2b).

236 In addition, although to a lower extent, the levels of lipids in VLDL particles, serum triglycerides,  
237 glycoprotein acetyls, apolipoprotein B, total fatty acids, monounsaturated fatty acids and leucine  
238 decreased when abdominal fat reduced.

## 239 **4. Discussion**

240 We investigated the relation between lifestyle intervention-induced changes in body composition,  
241 specifically abdominal fat, and the accompanying molecular changes in older adults independent of  
242 general weight loss. In young and old individuals abdominal fat mainly associates with a smaller HDL  
243 diameter, higher VLDL particle concentrations and higher circulating levels of triglycerides and  
244 glycoprotein acetyls. In older adults abdominal fat is additionally associated with higher circulating  
245 levels of glycerol and 3-hydroxybutyrate. Furthermore, we showed that after adjustment for BMI, as



246 a measure of overall adiposity, circulating metabolic biomarkers were still associated with abdominal  
247 fat. The more abdominal fat, the smaller the HDL diameter, and the lower the concentration of lipids  
248 is in HDL particles, and the higher the concentration of lipids in VLDL particles. In addition, if there  
249 was more abdominal fat, the circulating levels of glycerol, 3-hydroxybutyrate, leucine and  
250 glycoprotein acetyls were higher. This metabolic biomarker profile associated with abdominal fat  
251 indicates a high risk for cardiovascular disease<sup>[6]</sup>. We next showed that the intervention beneficially  
252 affected especially abdominal fat as well as the majority of the tested metabolic biomarkers (46), of  
253 which 26 are known to associate with cardiovascular disease<sup>[6]</sup>. Next, we show that the lifestyle-  
254 induced decrease of circulating glycerol levels and increase in HDL diameter can be explained by the  
255 loss of abdominal fat. Hence, the lifestyle-induced reduction of abdominal fat in older adults is  
256 reflected by decreased circulating glycerol levels and larger HDL diameter.

257 In older people, measures of BMI or body weight are not able to discriminate with high cardio-  
258 metabolic disease risk, i.e. low muscle mass and high abdominal fat mass, from those with low risk,  
259 i.e. high muscle mass and low abdominal fat mass<sup>[23-25]</sup>. Of the people with an average BMI, around  
260 50% has a percentage of body fat that is too high for their age and gender<sup>[26]</sup> and 30% is  
261 metabolically unhealthy<sup>[27]</sup>. It is known that high body fat and not so much high body weight is  
262 associated with an increased risk for cardio-metabolic disease<sup>[28]</sup>. The relatively simple DXA  
263 measures for (abdominal) fat mass would then better be able to identify people with high  
264 cardiometabolic risk. Because a lifestyle change that reduces caloric intake and increases physical  
265 activity may not be beneficial for each older person, it would be crucial to monitor the metabolic  
266 effects of lifestyle interventions aimed at reducing the cardio-metabolic disease risk. We found that  
267 the healthy reduction in abdominal fat during a lifestyle change was, independent of general weight  
268 loss, reflected in by lower circulating glycerol concentrations and larger HDL diameter. Hence, these  
269 <sup>1</sup>H-NMR measures may be further explored to monitor the beneficial effects of a lifestyle change in  
270 older people. Circulating glycerol levels and HDL diameter may be valuable tools to monitor  
271 cardiometabolic health in older people performing a lifestyle change.

272 The association of circulating metabolic biomarkers with abdominal fat has been frequently  
273 observed in previous studies<sup>[5, 29, 30]</sup>. We now showed in older adults, that after adjusting for BMI,  
274 glycerol particularly associated with abdominal fat measures. Glycerol is produced by white adipose  
275 tissue to dispose of excess glucose<sup>[31]</sup> leading, via hepatic gluconeogenesis, to an increase in  
276 circulating glucose levels. A high level of circulating glycerol is a known biomarker for an increasing  
277 risk for hyperglycemia and type 2 diabetes<sup>[11]</sup>. Increased HDL diameter also reflects reduced  
278 abdominal fat independent of BMI, which is in concordance with previous observations<sup>[32]</sup>. Small,

279 dense HDL subfractions promote cholesterol efflux from foam cell macrophages in the artery wall<sup>[33]</sup>,  
280 which would reduce atherosclerotic lesions. We hypothesize that when there is a large amount of  
281 abdominal fat, high levels of cholesterol require large cholesterol efflux to clear the foam cells.  
282 Hence, when abdominal fat is reduced, for example by a lifestyle intervention, the cholesterol efflux  
283 is lowered and the number of small HDL particles is reduced, resulting in higher overall HDL  
284 diameter. This suggests, in combination with our findings that older people during a lifestyle  
285 intervention mainly lose abdominal fat and decrease their cardiometabolic disease risk, that  
286 cardiometabolic disease risk is influenced by abdominal fat, independent of BMI and general weight  
287 loss, via circulating glycerol levels and HDL diameter.

288 The design of the GOTO study has some limitations. The change in lifestyle was for example not  
289 controlled, but guided to be feasible for participants. The way participants decreased their caloric  
290 intake was different for each participant, which was also the case for the increased physical activity.  
291 Though we endeavoured a reduction of 12.5% of caloric intake and 12.5% more physical activity, we  
292 are currently not able to analyse to which extent the participants decreased their caloric intake and  
293 to which extent they increased their physical activity. Hence, it is unclear whether the changes in  
294 metabolic biomarker levels and abdominal fat were mainly due to the change in dietary pattern,  
295 physical exercise or the combination of both. This implies that the changes in metabolic biomarkers  
296 may be caused by the reduction in abdominal fat due to the lifestyle change, although they may also  
297 result from the changes in dietary pattern. Another limitation is that the sample size of the GOTO  
298 study does not allow for gender stratified analyses. However, the majority of the female GOTO  
299 participants is postmenopausal and sex difference in body composition may therefore be limited.  
300 Since body composition and the accompanying cardiometabolic disease risk is a serious issue among  
301 older people, the older age of the GOTO study participants is advantageous.

302 In conclusion, the reduction of abdominal fat in older people due to a lifestyle change, is specifically  
303 reflected by decreased circulating glycerol concentration and larger HDL particle diameter,  
304 independent of general weight loss. Hence, to monitor the beneficial effects of a lifestyle change at  
305 older age circulating glycerol concentration and HDL diameter may be valuable tools.

306

## 307 **Acknowledgements**

308 The research leading to these results has received funding from the European Union's Seventh  
309 Framework Programme (FP7/2007–2011) under grant agreement number 259679. This study was  
310 financially supported by the Netherlands Consortium for Healthy Ageing (grant 050-060-810), in the  
311 framework of the Netherlands Genomics Initiative, Netherlands Organization for Scientific Research  
312 (NWO); by BBMRI-NL, a Research Infrastructure financed by the Dutch government (NWO  
313 184.021.007, 184.033.111) and by the Netherlands CardioVascular Research Initiative (CVON201-  
314 03). J. Deelen was financially supported by the Alexander von Humboldt Foundation. The funding  
315 agencies had no role in the design and conduct of the study; collection, management, analysis, and  
316 interpretation of the data; and preparation, review, or approval of the manuscript.

317 M.B., B.A.M.S., E.B.A., and P.E.S. designed the study; B.A.M.S., P.D.-S., L.F.G-O., J.G., J.D., O.R., M.A.-  
318 K., and D.H. were involved in data acquisition; M.B., B.A.M.S., E.B.A., R.N., and P.E.S. analyzed and  
319 interpreted the data; M.B., B.A.M.S., E.B.A., and P.E.S. drafted the manuscript; Critical revision was  
320 performed by R.N., J.D., O.R., E.J.M.F., P.E.S.. All the authors read and approved the final manuscript.

321 We thank all staff members and Bachelor's and Master's students who contributed to the  
322 preparation, design, and performance of this intervention trial and/or assisted on the project. Last  
323 but not least, our gratitude goes to all participants who did their very best to adhere to the  
324 intervention guidelines and underwent all measurements.

## 325 **Conflict of Interest**

326 The authors declare no conflict of interest

## 327 **5. References**

- 328
- 329 [1] J. P. Despres, I. Lemieux, *Nature*. **2006**, *444*, 881.
- 330 [2] C. E. Dale, G. Fatemifar, T. M. Palmer, J. White, D. Prieto-Merino, D. Zabaneh, J. E. L.  
331 Engmann, T. Shah, A. Wong, H. R. Warren, S. McLachlan, S. Trompet, M. Moldovan, R. W.  
332 Morris, R. Sofat, M. Kumari, E. Hypponen, B. J. Jefferis, T. R. Gaunt, Y. Ben-Shlomo, A. Zhou,  
333 A. Gentry-Maharaj, A. Ryan, U. Consortium, M. Consortium, R. Mutsert, R. Noordam, M. J.  
334 Caulfield, J. W. Jukema, B. B. Worrall, P. B. Munroe, U. Menon, C. Power, D. Kuh, D. A.  
335 Lawlor, S. E. Humphries, D. O. Mook-Kanamori, N. Sattar, M. Kivimaki, J. F. Price, G. Davey  
336 Smith, F. Dudbridge, A. D. Hingorani, M. V. Holmes, J. P. Casas, *Circulation*. **2017**, *135*, 2373.
- 337 [3] U. Masharani, I. D. Goldfine, J. F. Youngren, *Metabolism*. **2009**, *58*, 1602.
- 338 [4] H. Vatanparast, P. D. Chilibeck, S. M. Cornish, J. P. Little, L. S. Paus-Jenssen, A. M. Case, H. J.  
339 Biem, *Obesity (Silver Spring)*. **2009**, *17*, 1635.
- 340 [5] L. H. Bogl, S. M. Kaye, J. T. Ramo, A. J. Kangas, P. Soininen, A. Hakkarainen, J. Lundbom, N.  
341 Lundbom, A. Ortega-Alonso, A. Rissanen, M. Ala-Korpela, J. Kaprio, K. H. Pietilainen,  
342 *Metabolism*. **2016**, *65*, 111.

- 343 [6] P. Wurtz, A. S. Havulinna, P. Soininen, T. Tynkkynen, D. Prieto-Merino, T. Tillin, A. Ghorbani,  
344 A. Artati, Q. Wang, M. Tiainen, A. J. Kangas, J. Kettunen, J. Kaikkonen, V. Mikkila, A. Jula, M.  
345 Kahonen, T. Lehtimaki, D. A. Lawlor, T. R. Gaunt, A. D. Hughes, N. Sattar, T. Illig, J. Adamski,  
346 T. J. Wang, M. Perola, S. Ripatti, R. S. Vasani, O. T. Raitakari, R. E. Gerszten, J. P. Casas, N.  
347 Chaturvedi, M. Ala-Korpela, V. Salomaa, *Circulation*. **2015**, *131*, 774.
- 348 [7] A. Stancakova, M. Civelek, N. K. Saleem, P. Soininen, A. J. Kangas, H. Cederberg, J. Paananen,  
349 J. Pihlajamaki, L. L. Bonnycastle, M. A. Morcken, M. Boehnke, P. Pajukanta, A. J. Lusis, F. S.  
350 Collins, J. Kuusisto, M. Ala-Korpela, M. Laakso, *Diabetes*. **2012**, *61*, 1895.
- 351 [8] T. J. Wang, M. G. Larson, R. S. Vasani, S. Cheng, E. P. Rhee, E. McCabe, G. D. Lewis, C. S. Fox,  
352 P. F. Jacques, C. Fernandez, C. J. O'Donnell, S. A. Carr, V. K. Mootha, J. C. Florez, A. Souza, O.  
353 Melander, C. B. Clish, R. E. Gerszten, *Nat Med*. **2011**, *17*, 448.
- 354 [9] M. Fizelova, M. Miilunpohja, A. J. Kangas, P. Soininen, J. Kuusisto, M. Ala-Korpela, M. Laakso,  
355 A. Stancakova, *Atherosclerosis*. **2015**, *240*, 272.
- 356 [10] T. Tillin, A. D. Hughes, Q. Wang, P. Wurtz, M. Ala-Korpela, N. Sattar, N. G. Forouhi, I. F.  
357 Godsland, S. V. Eastwood, P. M. McKeigue, N. Chaturvedi, *Diabetologia*. **2015**, *58*, 968.
- 358 [11] Y. Mahendran, H. Cederberg, J. Vangipurapu, A. J. Kangas, P. Soininen, J. Kuusisto, M.  
359 Uusitupa, M. Ala-Korpela, M. Laakso, *Diabetes Care*. **2013**, *36*, 3732.
- 360 [12] A. Floegel, N. Stefan, Z. Yu, K. Muhlenbruch, D. Drogan, H. G. Joost, A. Fritsche, H. U. Haring,  
361 M. Hrabe de Angelis, A. Peters, M. Roden, C. Prehn, R. Wang-Sattler, T. Illig, M. B. Schulze, J.  
362 Adamski, H. Boeing, T. Pischon, *Diabetes*. **2013**, *62*, 639.
- 363 [13] O. van de Rest, B. A. Schutte, J. Deelen, S. A. Stassen, E. B. van den Akker, D. van Heemst, P.  
364 Dibbets-Schneider, R. A. van Dipten-van der Veen, M. Kelderman, T. Hankemeier, S. P.  
365 Mooijaart, J. van der Grond, J. J. Houwing-Duistermaat, M. Beekman, E. J. Feskens, P. E.  
366 Slagboom, *Aging (Albany NY)*. **2016**, *8*, 111.
- 367 [14] D. E. Larson-Meyer, B. R. Newcomer, L. K. Heilbronn, J. Volaufova, S. R. Smith, A. J. Alfonso,  
368 M. Lefevre, J. C. Rood, D. A. Williamson, E. Ravussin, *Obesity (Silver Spring)*. **2008**, *16*, 1355.
- 369 [15] L. K. Heilbronn, L. de Jonge, M. I. Frisard, J. P. DeLany, D. E. Larson-Meyer, J. Rood, T.  
370 Nguyen, C. K. Martin, J. Volaufova, M. M. Most, F. L. Greenway, S. R. Smith, W. A. Deutsch,  
371 D. A. Williamson, E. Ravussin, *Jama*. **2006**, *295*, 1539.
- 372 [16] L. M. Redman, L. K. Heilbronn, C. K. Martin, A. Alfonso, S. R. Smith, E. Ravussin, *J Clin*  
373 *Endocrinol Metab*. **2007**, *92*, 865.
- 374 [17] B. J. Nicklas, X. Wang, T. You, M. F. Lyles, J. Demons, L. Easter, M. J. Berry, L. Lenchik, J. J.  
375 Carr, *Am J Clin Nutr*. **2009**, *89*, 1043.
- 376 [18] E. P. Weiss, J. O. Holloszy, *J Nutr*. **2007**, *137*, 1087.
- 377 [19] M. Rondanelli, C. Klersy, S. Perna, M. A. Faliva, G. Montorfano, P. Roderi, I. Colombo, P. A.  
378 Corsetto, M. Fioravanti, S. B. Solerte, A. M. Rizzo, *Lipids Health Dis*. **2015**, *14*, 139.
- 379 [20] R. G. Westendorp, D. van Heemst, M. P. Roziing, M. Frolich, S. P. Mooijaart, G. J. Blauw, M.  
380 Beekman, B. T. Heijmans, A. J. de Craen, P. E. Slagboom, G. Leiden Longevity Study, *J Am*  
381 *Geriatr Soc*. **2009**, *57*, 1634.
- 382 [21] P. Soininen, A. J. Kangas, P. Wurtz, T. Suna, M. Ala-Korpela, *Circ Cardiovasc Genet*. **2015**, *8*,  
383 192.
- 384 [22] P. Wurtz, Q. Wang, A. J. Kangas, R. C. Richmond, J. Skarp, M. Tiainen, T. Tynkkynen, P.  
385 Soininen, A. S. Havulinna, M. Kaakinen, J. S. Viikari, M. J. Savolainen, M. Kahonen, T.  
386 Lehtimaki, S. Mannisto, S. Blankenberg, T. Zeller, J. Laitinen, A. Pouta, P. Mantyselka, M.  
387 Vanhala, P. Elliott, K. H. Pietilainen, S. Ripatti, V. Salomaa, O. T. Raitakari, M. R. Jarvelin, G. D.  
388 Smith, M. Ala-Korpela, *PLoS Med*. **2014**, *11*, e1001765.
- 389 [23] A. Gaba, M. Pridalova, *Eur J Clin Nutr*. **2016**, *70*, 898.
- 390 [24] D. O. Okorodudu, M. F. Jumean, V. M. Montori, A. Romero-Corral, V. K. Somers, P. J. Erwin,  
391 F. Lopez-Jimenez, *Int J Obes (Lond)*. **2010**, *34*, 791.
- 392 [25] J. A. Batsis, T. A. Mackenzie, S. J. Bartels, K. R. Sahakyan, V. K. Somers, F. Lopez-Jimenez, *Int J*  
393 *Obes (Lond)*. **2016**, *40*, 761.

- 394 [26] K. J. Smalley, A. N. Knerr, Z. V. Kendrick, J. A. Colliver, O. E. Owen, *Am J Clin Nutr.* **1990**, *52*,  
395 405.
- 396 [27] A. J. Tomiyama, J. M. Hunger, J. Nguyen-Cuu, C. Wells, *Int J Obes (Lond).* **2016**, *40*, 883.
- 397 [28] P. B. Maffetone, I. Rivera-Dominguez, P. B. Laursen, *Front Public Health.* **2016**, *4*, 279.
- 398 [29] J. E. Ho, M. G. Larson, A. Ghorbani, S. Cheng, M. H. Chen, M. Keyes, E. P. Rhee, C. B. Clish, R.  
399 S. Vasan, R. E. Gerszten, T. J. Wang, *PLoS One.* **2016**, *11*, e0148361.
- 400 [30] I. Schlecht, W. Gronwald, G. Behrens, S. E. Baumeister, J. Hertel, J. Hochrein, H. U. Zacharias,  
401 B. Fischer, P. J. Oefner, M. F. Leitzmann, *PLoS One.* **2017**, *12*, e0175133.
- 402 [31] F. Rotondo, A. C. Ho-Palma, X. Remesar, J. A. Fernandez-Lopez, M. D. M. Romero, M.  
403 Alemany, *Sci Rep.* **2017**, *7*, 8983.
- 404 [32] I. J. Neeland, C. R. Ayers, A. K. Rohatgi, A. T. Turer, J. D. Berry, S. R. Das, G. L. Vega, A. Khera,  
405 D. K. McGuire, S. M. Grundy, J. A. de Lemos, *Obesity (Silver Spring).* **2013**, *21*, E439.
- 406 [33] X. M. Du, M. J. Kim, L. Hou, W. Le Goff, M. J. Chapman, M. Van Eck, L. K. Curtiss, J. R. Burnett,  
407 S. P. Cartland, C. M. Quinn, M. Kockx, A. Kontush, K. A. Rye, L. Kritharides, W. Jessup, *Circ*  
408 *Res.* **2015**, *116*, 1133.

## 409 **Figure captions**

410 **Figure 1: BMI adjusted partial correlation coefficients between circulating metabolic biomarkers**  
411 **and body composition measures at baseline.** Android fat (%), gynoid fat (%), trunk fat (%), leg fat  
412 (%), whole body fat (%), indicate the ratio of fat mass to total mass in that body area. Fat/lean ratio  
413 indicates the ratio of whole body fat mass to whole body lean mass. The blue/red colour key  
414 denotes the magnitude of the correlation coefficients. The row colours indicate the clusters of body  
415 composition parameters based on their correlations with circulating metabolic biomarkers. Green:  
416 abdominal fat; violet: whole body fat; orange: ratio of lower body fat to whole body fat; yellow:  
417 lower body fat; blue: lean mass. All metabolic biomarkers were LN transformed and standard  
418 normal-transformed. Complete names of the metabolic biomarkers are written down in Table S2. \*p  
419  $< 3.5 \times 10^{-5}$  (0.05/(65 metabolic biomarkers x 22 body composition parameters)).

420  
421 **Figure 2: Change in local fat percentage in the whole body, trunk, android, gynoid and leg area**  
422 **after the intervention, stratified for gender.** Red: women; Gray: men. The lower and upper  
423 boundary of the boxes indicates the interquartile distance (IQR) (the 25<sup>th</sup> and 75<sup>th</sup> percentile). The  
424 line within the box is the median. The lower whisker indicates the lower adjacent value; the upper  
425 whisker indicates the higher adjacent value. Gray dots are individual outliers indicating values that  
426 are more than 1.5 times the IQR.

427  
428

429 **Table 1. Baseline characteristics of the GOTO study population\***

|                                           | <b>N</b> | <b>Mean</b> | <b>SD</b> |
|-------------------------------------------|----------|-------------|-----------|
| Age (years)                               | 132      | 62.8        | 6.0       |
| % Female                                  | 65       | 49.2        |           |
| % Lipid lowering medication               | 23       | 17.4        |           |
| % Antihypertensive medication             | 41       | 31.1        |           |
| <b>Anthropometrics</b>                    |          |             |           |
| Height (m)                                | 132      | 1.71        | 0.09      |
| Weight (kg)                               | 132      | 79.5        | 10.0      |
| Body mass index (kg/m <sup>2</sup> )      | 132      | 27.0        | 2.5       |
| Waist circumference (cm)                  | 132      | 96.1        | 8.1       |
| Hip circumference (cm)                    | 132      | 104.2       | 5.2       |
| Waist/hip ratio (cm)                      | 132      | 0.9         | 0.1       |
| Waist/height ratio                        | 132      | 56.1        | 4.7       |
| <b>DXA measures<sup>#</sup></b>           |          |             |           |
| Whole body lean mass (kg)                 | 132      | 54.3        | 9.8       |
| Whole body fat (kg)                       | 132      | 25.6        | 6.2       |
| Whole body fat (%)                        | 132      | 32.3        | 7.4       |
| Trunk fat (kg)                            | 132      | 13.1        | 3.6       |
| Trunk fat (%)                             | 132      | 32.6        | 7.2       |
| Android fat (kg)                          | 132      | 2.2         | 0.7       |
| Android fat (%)                           | 132      | 35.0        | 7.3       |
| Gynoid fat (kg)                           | 132      | 4.1         | 1.1       |
| Gynoid fat (%)                            | 132      | 32.8        | 8.3       |
| Leg fat (kg)                              | 132      | 8.3         | 2.7       |
| Leg fat (%)                               | 132      | 32.2        | 9.5       |
| Trunk fat /whole body fat ratio           | 132      | 0.51        | 0.06      |
| Android fat /whole body fat ratio         | 132      | 0.09        | 0.02      |
| Gynoid fat /whole body fat ratio          | 132      | 0.16        | 0.02      |
| Leg fat /whole body fat ratio             | 132      | 0.32        | 0.06      |
| Android fat/gynoid fat ratio              | 132      | 1.10        | 0.20      |
| Whole body fat/Whole body lean mass ratio | 132      | 0.49        | 0.17      |

430 \*The subgroup of 132 participants (out of the 164) having data on anthropometrics, DXA measures and <sup>1</sup>H-

431 NMR metabolomics

432 <sup>#</sup>See Supporting Information for recognition of body regions in DXA images (Figure S1)

433 SD= standard deviation

434

435 **Table 2a. Effect of change in android fat mass on change circulating glycerol levels due to the**  
 436 **lifestyle intervention.**

| Glycerol levels*                    | Effect size | CI                   | P-value                        |
|-------------------------------------|-------------|----------------------|--------------------------------|
| <b>Android Fat mass<sup>#</sup></b> | <b>0.35</b> | <b>(0.25 - 0.46)</b> | <b>1.45 x 10<sup>-11</sup></b> |
| Weight (kg)                         | -0.01       | (-0.03 - 0.00)       | 0.024                          |
| Age (years)                         | 0.01        | (0.00 - 0.03)        | 0.084                          |
| Sex <sup>^</sup>                    | -0.03       | (-0.23 - 0.16)       | 0.736                          |
| Status <sup>¥</sup>                 | 0.04        | (-0.10 - 0.17)       | 0.576                          |
| Use of lipid lowering medication    | 0.01        | (-0.18 - 0.21)       | 0.884                          |

437  
 438 **Table 2b. Effect of change in trunk fat over whole body fat ratio on change in HDL diameter due to**  
 439 **the lifestyle intervention.**

| HDL diameter*                                     | Effect size  | CI                     | P-value                       |
|---------------------------------------------------|--------------|------------------------|-------------------------------|
| <b>Trunk fat/whole body fat ratio<sup>#</sup></b> | <b>-0.36</b> | <b>(-0.48 - -0.24)</b> | <b>2.56 x 10<sup>-9</sup></b> |
| Weight (kg)                                       | -0.03        | (-0.04 - -0.01)        | 7.14 x 10 <sup>-5</sup>       |
| Age (years)                                       | 0.00         | (-0.02 - 0.02)         | 0.990                         |
| Sex <sup>^</sup>                                  | -0.21        | (-0.45 - 0.03)         | 0.093                         |
| Status <sup>¥</sup>                               | 0.27         | (0.06 - 0.49)          | 0.013                         |
| Use of lipid lowering medication                  | -0.34        | (-0.65 - -0.03)        | 0.029                         |

440 Random effects (mixed) models with glycerol levels(a) or HDL diameter (b) as outcome and android  
 441 fat mass (a) or trunk fat over whole body mass ratio (b) as determinant, and weight as time-varying  
 442 covariate, and age, sex, status and lipid medication use as time-invariable covariates.

443 \* Ln-transformed and Z-scaled

444 <sup>#</sup> Z-scaled

445 <sup>^</sup> 0=Female, 1=Male

446 <sup>¥</sup> 0=Member of long-lived family, 1=Control

447 CI=Confidence Interval

448 N=131 individuals contributed to these analyses



### Color Key

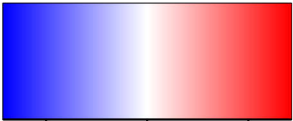

-5      0      5  
Value

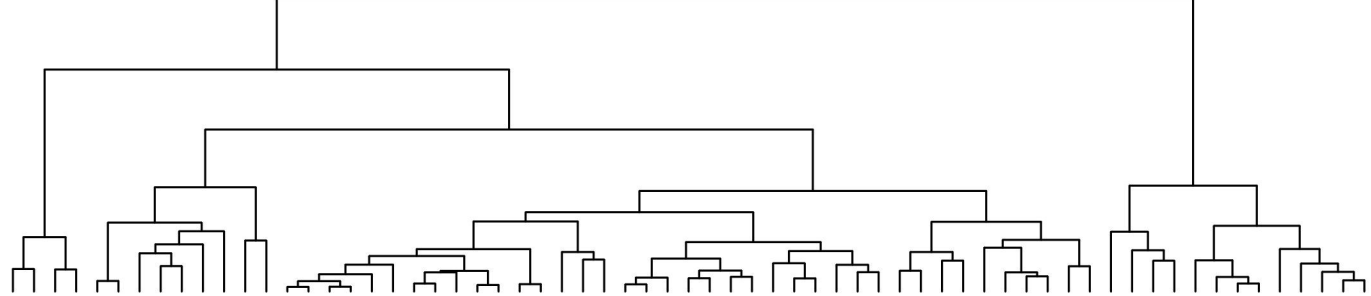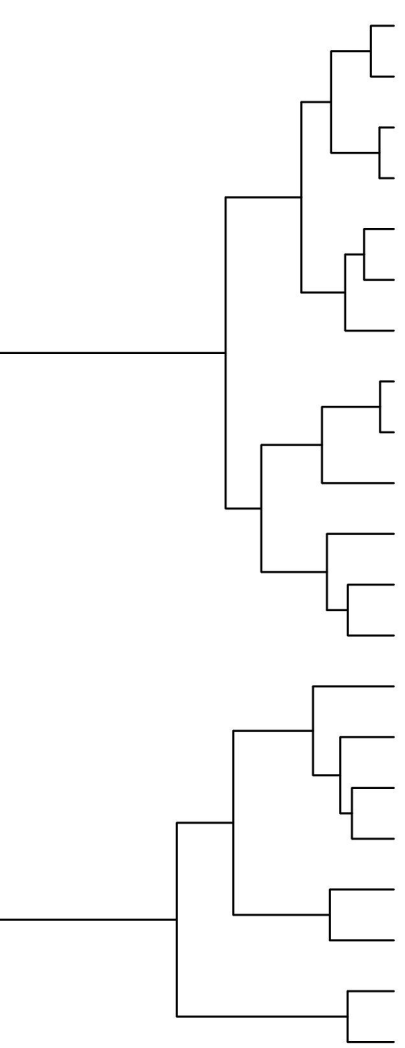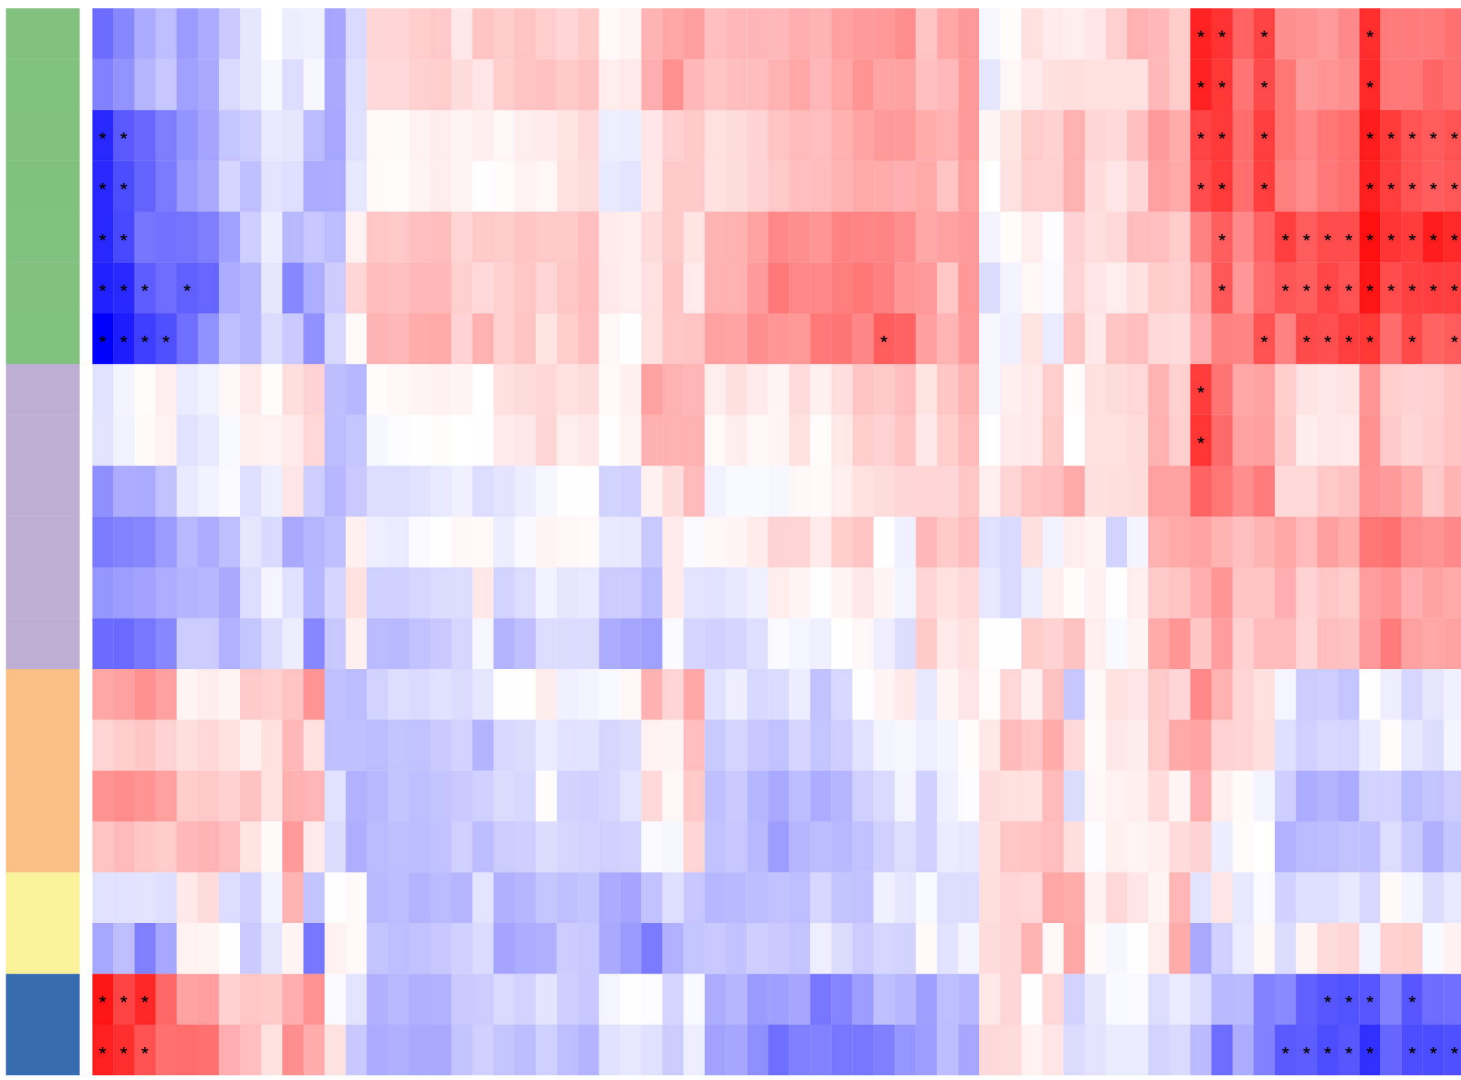

Android fat (%)  
Trunk fat (%)  
Android fat  
Trunk fat  
Android fat/whole body fat ratio  
Trunk fat/whole body fat ratio  
Android/gynoid ratio  
Fat/lean ratio  
Whole body fat (%)  
Whole body fat  
Waist/hip ratio  
Waist/height ratio  
Waist circumference  
Gynoid fat (%)  
Gynoid fat  
Leg fat (%)  
Leg fat  
Hip circumference  
Whole body lean mass  
Gynoid fat/whole body fat ratio  
Leg fat/whole body fat ratio

HDLD  
LHDLL  
XLHDLL  
HDLCL  
FAw6FA  
PUFAFA  
Gly  
MHDLL  
Ace  
UnsatDeg  
ApoA1  
LDLD  
SFAFA  
IDL  
IDLCL  
LLDLL  
LDLCL  
LA  
Alb  
SerumC  
EstC  
Pyr  
FAw6  
PUFA  
TotPG  
PC  
SM  
Ala  
Val  
MLDLL  
SLDLL  
non\_HDLCL  
SFA  
TotFA  
XSVDLL  
ApoB  
MUFA  
FAw3  
DHA  
Glc  
SHDLL  
MUFAFA  
AcAce  
Gln  
His  
Cit  
Crea  
Lac  
FAw3FA  
FALen  
Phe  
Tyr  
GloI  
boHBut  
Leu  
Ile  
XXLVDLL  
VLDLCL  
SerumTG  
SVDLL  
Gp  
VLDLD  
MLDLL  
XLVDLL  
LVLDLL

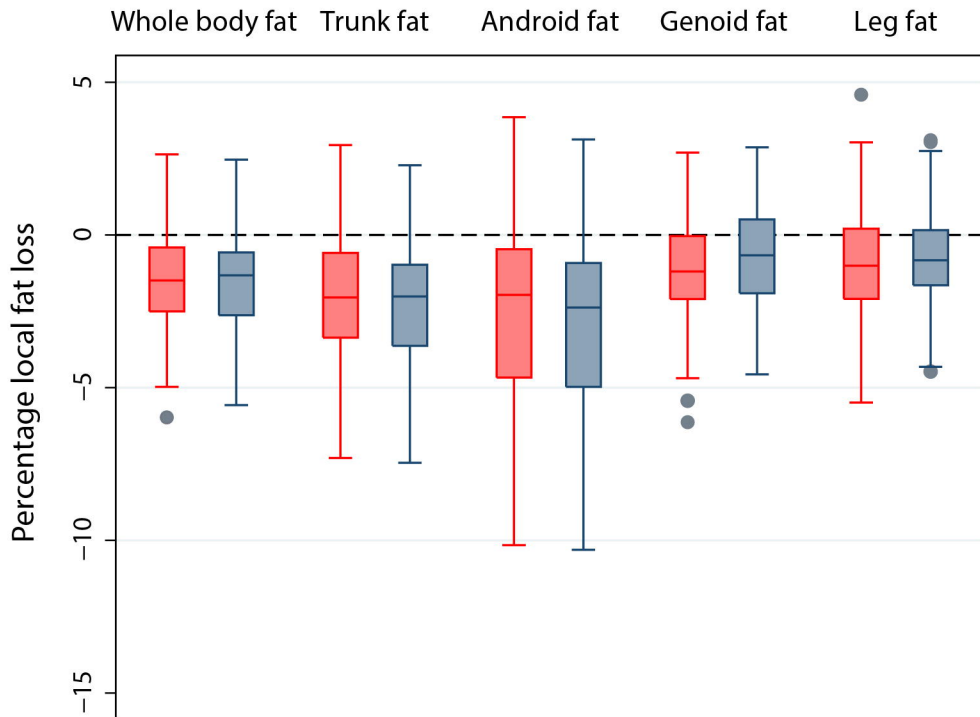

Source: https://www.biorxiv.org/content/10.1101/718023v1.full.pdf
