# Supplementary material for: Lifestyle-intervention-induced reduction of abdominal fat is reflected by a decreased circulating glycerol level and an increased HDL diameter
Source: bioRxiv or medRxiv preprint supplement (doi:10.1101/718023), 2019-07-30
Supplement: Supplementary file [file media-2.pdf]

**Table S1. Baseline characteristics of the complete GOTO study population\***

|                                            | <b>N</b> | <b>Mean</b> | <b>SD</b> |
|--------------------------------------------|----------|-------------|-----------|
| Age (years)                                | 164      | 63.0        | 5.7       |
| % Female                                   | 81       | 49.4        |           |
| % Lipid lowering medication                | 29       | 17.7        |           |
| % Antihypertensive medication              | 51       | 31.1        |           |
| <b>Anthropometrics</b>                     |          |             |           |
| Height (m)                                 | 163      | 1.7         | 0.1       |
| Weight (kg)                                | 163      | 79.4        | 9.8       |
| BMI (kg/m <sup>2</sup> )                   | 163      | 27.0        | 2.5       |
| Waist circumference (cm)                   | 164      | 96.1        | 8.0       |
| Hip circumference (cm)                     | 164      | 104.3       | 5.4       |
| Waist/hip ratio (cm)                       | 164      | 0.9         | 0.1       |
| Waist/height ratio                         | 163      | 56.1        | 4.6       |
| <b>DXA measures</b>                        |          |             |           |
| Whole body lean mass (kg)                  | 142      | 54.1        | 9.7       |
| Whole body fat (kg)                        | 142      | 25.6        | 6.2       |
| Whole body fat (%)                         | 142      | 32.3        | 7.3       |
| Trunk fat (kg)                             | 142      | 13.1        | 3.6       |
| Trunk fat (%)                              | 142      | 32.7        | 7.2       |
| Android fat (kg)                           | 142      | 2.2         | 0.7       |
| Android fat (%)                            | 142      | 35.1        | 7.3       |
| Gynoid fat (kg)                            | 142      | 4.1         | 1.1       |
| Gynoid fat (%)                             | 142      | 32.8        | 8.2       |
| Leg fat (kg)                               | 142      | 8.32        | 2.67      |
| Leg fat (%)                                | 142      | 32.13       | 9.36      |
| Trunk fat /whole body fat ratio            | 142      | 0.51        | 0.06      |
| Adroid fat /whole body fat ratio           | 142      | 0.09        | 0.02      |
| Gynoid fat /whole body fat ratio           | 142      | 0.16        | 0.02      |
| Leg fat /whole body fat ratio              | 142      | 0.32        | 0.06      |
| Android fat/gynoid fat ratio               | 142      | 1.10        | 0.20      |
| Whole body fat/Whole body lean mass ratio* | 142      | 0.49        | 0.17      |

\*The complete group 164 participants

SD= standard deviation

**Table S2. Nomenclature of the 65 metabolic biomarkers**

| Parameter  | Description                                                                    | Percentage missing values |
|------------|--------------------------------------------------------------------------------|---------------------------|
| XXL-VLDL-L | Total lipids in chylomicrons and extremely large VLDL (mmol/l)                 | 2.3                       |
| XL-VLDL-L  | Total lipids in very large VLDL (mmol/l)                                       | 3.0                       |
| L-VLDL-L   | Total lipids in large VLDL (mmol/l)                                            | 1.5                       |
| M-VLDL-L   | Total lipids in medium VLDL (mmol/l)                                           | 0.0                       |
| S-VLDL-L   | Total lipids in small VLDL (mmol/l)                                            | 0.0                       |
| XS-VLDL-L  | Total lipids in very small VLDL (mmol/l)                                       | 0.0                       |
| IDL-L      | Total lipids in IDL (mmol/l)                                                   | 0.0                       |
| L-LDL-L    | Total lipids in large LDL (mmol/l)                                             | 0.0                       |
| M-LDL-L    | Total lipids in medium LDL (mmol/l)                                            | 0.0                       |
| S-LDL-L    | Total lipids in small LDL (mmol/l)                                             | 0.0                       |
| XL-HDL-L   | Total lipids in very large HDL (mmol/l)                                        | 0.0                       |
| L-HDL-L    | Total lipids in large HDL (mmol/l)                                             | 2.3                       |
| M-HDL-L    | Total lipids in medium HDL (mmol/l)                                            | 0.0                       |
| S-HDL-L    | Total lipids in small HDL (mmol/l)                                             | 0.0                       |
| VLDL-D     | Mean diameter for VLDL particles (nm)                                          | 0.0                       |
| LDL-D      | Mean diameter for LDL particles (nm)                                           | 0.0                       |
| HDL-D      | Mean diameter for HDL particles (nm)                                           | 0.0                       |
| Serum_C    | Serum total cholesterol (mmol/l)                                               | 0.0                       |
| non-HDL-C  | Total cholesterol in non-HDL (mmol/l)                                          | 0.0                       |
| VLDL-C     | Total cholesterol in VLDL (mmol/l)                                             | 0.0                       |
| IDL-C      | Total cholesterol in IDL (mmol/l)                                              | 0.0                       |
| LDL-C      | Total cholesterol in LDL (mmol/l)                                              | 0.0                       |
| HDL-C      | Total cholesterol in HDL (mmol/l)                                              | 0.0                       |
| Est-C      | Esterified cholesterol (mmol/l)                                                | 1.5                       |
| Serum-TG   | Serum total triglycerides (mmol/l)                                             | 0.0                       |
| Tot-PG     | Total phosphoglycerides (mmol/l)                                               | 1.5                       |
| PC         | Phosphatidylcholine and other cholines (mmol/l)                                | 1.5                       |
| SM         | Sphingomyelins (mmol/l)                                                        | 1.5                       |
| ApoA1      | Apolipoprotein A-I (g/l)                                                       | 0.0                       |
| ApoB       | Apolipoprotein B (g/l)                                                         | 0.0                       |
| Tot-FA     | Total fatty acids (mmol/l)                                                     | 1.5                       |
| FALen      | Estimated description of fatty acid chain length, not actual carbon number ( ) | 1.5                       |
| UnsatDeg   | Estimated degree of unsaturation ( )                                           | 1.5                       |
| DHA        | 22:6, docosahexaenoic acid (mmol/l)                                            | 1.5                       |
| LA         | 18:2, linoleic acid (mmol/l)                                                   | 1.5                       |
| FAw3       | Omega-3 fatty acids (mmol/l)                                                   | 1.5                       |
| FAw6       | Omega-6 fatty acids (mmol/l)                                                   | 1.5                       |
| PUFA       | Polyunsaturated fatty acids (mmol/l)                                           | 1.5                       |
| MUFA       | Monounsaturated fatty acids; 16:1, 18:1 (mmol/l)                               | 1.5                       |
| SFA        | Saturated fatty acids (mmol/l)                                                 | 1.5                       |
| FAw3_FA    | Ratio of omega-3 fatty acids to total fatty acids (%)                          | 1.5                       |
| FAw6_FA    | Ratio of omega-6 fatty acids to total fatty acids (%)                          | 1.5                       |
| PUFA_FA    | Ratio of polyunsaturated fatty acids to total fatty acids (%)                  | 1.5                       |
| MUFA_FA    | Ratio of monounsaturated fatty acids to total fatty acids (%)                  | 1.5                       |
| SFA_FA     | Ratio of saturated fatty acids to total fatty acids (%)                        | 1.5                       |
| Glc        | Glucose (mmol/l)                                                               | 0.0                       |
| Lac        | Lactate (mmol/l)                                                               | 0.0                       |
| Pyr        | Pyruvate (mmol/l)                                                              | 0.8                       |
| Cit        | Citrate (mmol/l)                                                               | 0.0                       |
| Glol       | Glycerol (mmol/l)                                                              | 1.5                       |
| Ala        | Alanine (mmol/l)                                                               | 0.8                       |
| Gln        | Glutamine (mmol/l)                                                             | 0.0                       |
| Gly        | Glycine (mmol/l)                                                               | 0.0                       |
| His        | Histidine (mmol/l)                                                             | 0.0                       |
| Ile        | Isoleucine (mmol/l)                                                            | 0.8                       |
| Leu        | Leucine (mmol/l)                                                               | 0.8                       |
| Val        | Valine (mmol/l)                                                                | 1.5                       |
| Phe        | Phenylalanine (mmol/l)                                                         | 0.0                       |
| Tyr        | Tyrosine (mmol/l)                                                              | 0.0                       |
| Ace        | Acetate (mmol/l)                                                               | 0.0                       |
| AcAce      | Acetoacetate (mmol/l)                                                          | 0.0                       |
| bOHBut     | 3-hydroxybutyrate (mmol/l)                                                     | 1.5                       |
| Crea       | Creatinine (mmol/l)                                                            | 0.0                       |
| Alb        | Albumin (signal area)                                                          | 0.0                       |
| GP         | Glycoprotein acetyls, mainly a1-acid glycoprotein (mmol/l)                     | 0.0                       |

**Table S3. Significance of effect of lifestyle change on 1H-NMR metabolic biomarkers**  
 According to Supplemental table 2B from Van der Rest et al, Aging 2016 doi: 10.18632/aging.100877

| Parameter  | Description                                                                    | N   | Coefficient* | CI lower bound | CI upper bound | p-value  |
|------------|--------------------------------------------------------------------------------|-----|--------------|----------------|----------------|----------|
| XXL-VLDL-L | Total lipids in chylomicrons and extremely large VLDL (mmol/l)                 | 115 | -0.24        | -0.40          | -0.09          | 1.96E-03 |
| XL-VLDL-L  | Total lipids in very large VLDL (mmol/l)                                       | 103 | -0.31        | -0.47          | -0.14          | 2.36E-04 |
| L-VLDL-L   | Total lipids in large VLDL (mmol/l)                                            | 119 | -0.29        | -0.42          | -0.16          | 1.10E-05 |
| M-VLDL-L   | Total lipids in medium VLDL (mmol/l)                                           | 134 | -0.23        | -0.34          | -0.12          | 2.86E-05 |
| S-VLDL-L   | Total lipids in small VLDL (mmol/l)                                            | 134 | -0.28        | -0.39          | -0.18          | 2.23E-07 |
| XS-VLDL-L  | Total lipids in very small VLDL (mmol/l)                                       | 134 | -0.28        | -0.40          | -0.17          | 1.28E-06 |
| IDL-L      | Total lipids in IDL (mmol/l)                                                   | 134 | -0.24        | -0.34          | -0.15          | 1.39E-06 |
| L-LDL-L    | Total lipids in large LDL (mmol/l)                                             | 134 | -0.23        | -0.33          | -0.13          | 6.53E-06 |
| M-LDL-L    | Total lipids in medium LDL (mmol/l)                                            | 134 | -0.24        | -0.35          | -0.13          | 1.32E-05 |
| S-LDL-L    | Total lipids in small LDL (mmol/l)                                             | 134 | -0.27        | -0.37          | -0.16          | 7.95E-07 |
| XL-HDL-L   | Total lipids in very large HDL (mmol/l)                                        | 133 | 0.07         | -0.05          | 0.19           | 2.53E-01 |
| L-HDL-L    | Total lipids in large HDL (mmol/l)                                             | 127 | 0.08         | -0.01          | 0.17           | 6.89E-02 |
| M-HDL-L    | Total lipids in medium HDL (mmol/l)                                            | 134 | -0.12        | -0.25          | 0.02           | 8.94E-02 |
| S-HDL-L    | Total lipids in small HDL (mmol/l)                                             | 134 | -0.20        | -0.37          | -0.03          | 2.22E-02 |
| VLDL-D     | Mean diameter for VLDL particles (nm)                                          | 134 | -0.14        | -0.27          | 0.00           | 4.20E-02 |
| LDL-D      | Mean diameter for LDL particles (nm)                                           | 134 | 0.12         | -0.07          | 0.30           | 2.26E-01 |
| HDL-D      | Mean diameter for HDL particles (nm)                                           | 134 | 0.11         | 0.01           | 0.21           | 2.86E-02 |
| Serum_C    | Serum total cholesterol (mmol/l)                                               | 130 | -0.19        | -0.31          | -0.06          | 2.91E-03 |
| non-HDL-C  | Total cholesterol in non-HDL (mmol/l)                                          | 151 | -0.25        | -0.36          | -0.14          | 4.07E-06 |
| VLDL-C     | Total cholesterol in VLDL (mmol/l)                                             | 134 | -0.30        | -0.42          | -0.18          | 3.56E-07 |
| IDL-C      | Total cholesterol in IDL (mmol/l)                                              | 134 | -0.27        | -0.37          | -0.17          | 1.94E-07 |
| LDL-C      | Total cholesterol in LDL (mmol/l)                                              | 134 | -0.25        | -0.35          | -0.14          | 4.68E-06 |
| HDL-C      | Total cholesterol in HDL (mmol/l)                                              | 134 | 0.01         | -0.08          | 0.09           | 8.99E-01 |
| Est-C      | Esterified cholesterol (mmol/l)                                                | 130 | -0.31        | -0.42          | -0.20          | 1.28E-08 |
| Serum-TG   | Serum total triglycerides (mmol/l)                                             | 134 | -0.18        | -0.29          | -0.07          | 1.80E-03 |
| Tot-PG     | Total phosphoglycerides (mmol/l)                                               | 130 | -0.26        | -0.39          | -0.13          | 1.30E-04 |
| PC         | Phosphatidylcholine and other cholines (mmol/l)                                | 130 | -0.17        | -0.30          | -0.04          | 8.00E-03 |
| SM         | Sphingomyelins (mmol/l)                                                        | 130 | -0.26        | -0.36          | -0.16          | 3.73E-07 |
| ApoA1      | Apolipoprotein A-I (g/l)                                                       | 134 | -0.15        | -0.25          | -0.05          | 4.21E-03 |
| ApoB       | Apolipoprotein B (g/l)                                                         | 134 | -0.31        | -0.41          | -0.22          | 1.12E-10 |
| Tot-FA     | Total fatty acids (mmol/l)                                                     | 130 | -0.22        | -0.34          | -0.10          | 3.87E-04 |
| FALen      | Estimated description of fatty acid chain length, not actual carbon number ( ) | 130 | 0.41         | 0.22           | 0.61           | 2.43E-05 |
| UnsatDeg   | Estimated degree of unsaturation ( )                                           | 130 | -0.12        | -0.28          | 0.03           | 1.10E-01 |
| DHA        | 22:6, docosahexaenoic acid (mmol/l)                                            | 130 | -0.06        | -0.17          | 0.06           | 3.44E-01 |
| LA         | 18:2, linoleic acid (mmol/l)                                                   | 130 | -0.26        | -0.38          | -0.14          | 1.75E-05 |
| FAw3       | Omega-3 fatty acids (mmol/l)                                                   | 130 | -0.02        | -0.18          | 0.15           | 8.40E-01 |
| FAw6       | Omega-6 fatty acids (mmol/l)                                                   | 130 | -0.17        | -0.31          | -0.03          | 1.85E-02 |
| PUFA       | Polyunsaturated fatty acids (mmol/l)                                           | 130 | -0.32        | -0.43          | -0.20          | 5.03E-08 |
| MUFA       | Monounsaturated fatty acids; 16:1, 18:1 (mmol/l)                               | 130 | -0.21        | -0.32          | -0.10          | 2.11E-04 |
| SFA        | Saturated fatty acids (mmol/l)                                                 | 130 | -0.10        | -0.24          | 0.04           | 1.50E-01 |
| FAw3_FA    | Ratio of omega-3 fatty acids to total fatty acids (%)                          | 130 | -0.02        | -0.18          | 0.15           | 8.40E-01 |
| FAw6_FA    | Ratio of omega-6 fatty acids to total fatty acids (%)                          | 130 | -0.17        | -0.31          | -0.03          | 1.85E-02 |
| PUFA_FA    | Ratio of polyunsaturated fatty acids to total fatty acids (%)                  | 130 | -0.17        | -0.31          | -0.02          | 2.24E-02 |
| MUFA_FA    | Ratio of monounsaturated fatty acids to total fatty acids (%)                  | 130 | -0.13        | -0.25          | -0.01          | 2.85E-02 |
| SFA_FA     | Ratio of saturated fatty acids to total fatty acids (%)                        | 130 | 0.38         | 0.19           | 0.57           | 7.53E-05 |
| Glc        | Glucose (mmol/l)                                                               | 162 | -0.24        | -0.38          | -0.11          | 4.98E-04 |
| Lac        | Lactate (mmol/l)                                                               | 162 | -0.05        | -0.23          | 0.13           | 6.02E-01 |
| Pyr        | Pyruvate (mmol/l)                                                              | 161 | -0.26        | -0.43          | -0.09          | 2.26E-03 |
| Cit        | Citrate (mmol/l)                                                               | 162 | 0.20         | 0.05           | 0.35           | 1.00E-02 |
| GloI       | Glycerol (mmol/l)                                                              | 157 | -0.17        | -0.30          | -0.04          | 1.08E-02 |
| Ala        | Alanine (mmol/l)                                                               | 161 | 0.01         | -0.13          | 0.15           | 8.72E-01 |
| Gln        | Glutamine (mmol/l)                                                             | 162 | 0.19         | 0.06           | 0.33           | 4.43E-03 |
| Gly        | Glycine (mmol/l)                                                               | 161 | 0.20         | 0.12           | 0.29           | 1.50E-06 |
| His        | Histidine (mmol/l)                                                             | 162 | -0.52        | -0.71          | -0.34          | 3.23E-08 |
| Ile        | Isoleucine (mmol/l)                                                            | 161 | -0.12        | -0.24          | 0.00           | 5.30E-02 |
| Leu        | Leucine (mmol/l)                                                               | 161 | -0.18        | -0.31          | -0.05          | 8.22E-03 |
| Val        | Valine (mmol/l)                                                                | 160 | -0.12        | -0.26          | 0.03           | 1.08E-01 |
| Phe        | Phenylalanine (mmol/l)                                                         | 162 | -0.01        | -0.17          | 0.14           | 8.52E-01 |
| Tyr        | Tyrosine (mmol/l)                                                              | 162 | -0.24        | -0.41          | -0.07          | 5.35E-03 |
| Ace        | Acetate (mmol/l)                                                               | 162 | -0.01        | -0.13          | 0.11           | 8.48E-01 |
| AcAce      | Acetoacetate (mmol/l)                                                          | 162 | -0.10        | -0.26          | 0.07           | 2.41E-01 |
| bOHBut     | 3-hydroxybutyrate (mmol/l)                                                     | 158 | -0.15        | -0.30          | -0.01          | 3.77E-02 |
| Crea       | Creatinine (mmol/l)                                                            | 162 | -0.09        | -0.19          | 0.01           | 7.10E-02 |
| Alb        | Albumin (signal area)                                                          | 162 | -0.07        | -0.22          | 0.08           | 3.64E-01 |
| GP         | Glycoprotein acetyls, mainly a1-acid glycoprotein (mmol/l)                     | 162 | -0.15        | -0.27          | -0.04          | 7.83E-03 |

\*The significance of the effects of the intervention on metabolite measures were determined using a linear mixed model adjusted for age, gender, status (longevity family member or control) (fixed effects), household, and individual (random effects). Green p-values indicate nominal significant (p-value<0.05) changes in metabolite levels due to the lifestyle intervention (46 metabolites). CI= confidence interval

**Table S4. Changes in body composition due to the lifestyle intervention**

|                                           | ALL |             |      |          | FEMALE |             |      |          | MALE |             |      |          |
|-------------------------------------------|-----|-------------|------|----------|--------|-------------|------|----------|------|-------------|------|----------|
|                                           | N   | Mean change | SD   | p-value* | N      | Mean change | SD   | p-value# | N    | Mean change | SD   | p-value# |
| <b>Anthropometrics</b>                    |     |             |      |          |        |             |      |          |      |             |      |          |
| Weight (kg)                               | 132 | -3.36       | 2.33 | <0.001   | 65     | -3.35       | 2.09 | <0.001   | 67   | -3.37       | 2.55 | <0.001   |
| BMI (kg/m <sup>2</sup> )                  | 132 | -1.14       | 0.80 | <0.001   | 65     | -1.24       | 0.79 | <0.001   | 67   | -1.05       | 0.81 | <0.001   |
| Waist circumference (cm)                  | 132 | -4.51       | 5.44 | <0.001   | 65     | -4.60       | 5.43 | <0.001   | 67   | -4.42       | 5.50 | <0.001   |
| Hip circumference (cm)                    | 132 | -2.95       | 4.30 | <0.001   | 65     | -3.53       | 4.29 | <0.001   | 67   | -2.40       | 4.26 | <0.001   |
| Waist/hip ratio (cm)                      | 132 | -0.02       | 0.05 | <0.001   | 64     | -0.02       | 0.05 | 0.018    | 67   | -0.02       | 0.04 | <0.001   |
| Waist/height ratio                        | 132 | -2.65       | 3.23 | <0.001   | 64     | -2.81       | 3.32 | <0.001   | 67   | -2.49       | 3.16 | <0.001   |
| <b>DXA measures</b>                       |     |             |      |          |        |             |      |          |      |             |      |          |
| Whole body lean mass (kg)                 | 132 | -1.2        | 1.2  | <0.001   | 65     | -1.1        | 1.2  | <0.001   | 67   | -1.4        | 1.2  | <0.001   |
| Whole body fat (kg)                       | 132 | -2.2        | 1.8  | <0.001   | 65     | -2.3        | 1.7  | <0.001   | 67   | -2.1        | 1.9  | <0.001   |
| Whole body fat (%)                        | 132 | -1.5        | 1.7  | <0.001   | 65     | -1.5        | 1.7  | <0.001   | 67   | -1.5        | 1.7  | <0.001   |
| Trunk fat (kg)                            | 132 | -1.5        | 1.1  | <0.001   | 65     | -1.5        | 1.1  | <0.001   | 67   | -1.6        | 1.2  | <0.001   |
| Trunk fat (%)                             | 132 | -2.2        | 2.2  | <0.001   | 65     | -2.1        | 2.2  | <0.001   | 67   | -2.3        | 2.2  | <0.001   |
| Android fat (kg)                          | 132 | -0.3        | 0.3  | <0.001   | 65     | -0.3        | 0.3  | <0.001   | 67   | -0.4        | 0.3  | <0.001   |
| Android fat (%)                           | 132 | -2.6        | 3.0  | <0.001   | 65     | -2.4        | 3.1  | <0.001   | 67   | -2.9        | 2.9  | <0.001   |
| Gynoid fat (kg)                           | 132 | -0.3        | 0.3  | <0.001   | 65     | -0.4        | 0.3  | <0.001   | 67   | -0.2        | 0.3  | <0.001   |
| Gynoid fat (%)                            | 132 | -0.9        | 1.8  | <0.001   | 65     | -1.1        | 1.9  | <0.001   | 67   | -0.7        | 1.6  | <0.001   |
| Leg fat (kg)                              | 132 | -0.5        | 0.7  | <0.001   | 65     | -0.7        | 0.8  | <0.001   | 67   | -0.4        | 0.6  | <0.001   |
| Leg fat (%)                               | 132 | -0.8        | 1.7  | <0.001   | 65     | -0.9        | 1.8  | <0.001   | 67   | -0.7        | 1.6  | <0.001   |
| Trunk fat /whole body fat ratio           | 132 | 0.81        | 1.6  | <0.001   | 65     | 0.83        | 2.0  | <0.001   | 67   | 0.78        | 1.0  | <0.001   |
| Android fat /whole body fat ratio         | 132 | 0.23        | 1.1  | <0.001   | 65     | 0.33        | 1.5  | <0.001   | 67   | 0.14        | 0.2  | <0.001   |
| Gynoid fat /whole body fat ratio          | 132 | 0.06        | 0.9  | <0.001   | 65     | 0.12        | 0.8  | <0.001   | 67   | 0.00        | 1.0  | <0.001   |
| Leg fat /whole body fat ratio             | 132 | 0.11        | 1.6  | <0.001   | 65     | 0.10        | 2.0  | <0.001   | 67   | 0.11        | 1.2  | <0.001   |
| Android fat/gynoid fat ratio              | 132 | -0.06       | 0.1  | <0.001   | 65     | -0.04       | 0.1  | <0.001   | 67   | -0.09       | 0.1  | <0.001   |
| Whole body fat/Whole body lean mass ratio | 132 | -0.03       | 0.0  | <0.001   | 65     | -0.04       | 0.0  | <0.001   | 67   | -0.03       | 0.0  | <0.001   |

\*The significance of the effects of the intervention on body composition measures were determined using a linear mixed model adjusted for age, gender, status (longevity family member or control) (fixed effects), household, and individual (random effects).

#The significance of the effects of the intervention on body composition measures were determined using a linear mixed model adjusted for age, status (longevity family member or control) (fixed effects), and individual (random effects).

SD= standard deviation
